# Supplementary material
Source: publisher figshare collection journal article supplement (https://karger.figshare.com/ndownloader/files/8716027)
Supplement: Supplementary file 1 [file 8716027]

**Table S1** – List of 73 filtered GWAS variants from the National Human Genome Research Institute catalogue.

| **Gene** | **SNP** |
| --- | --- |
| *BABAM1* | rs8170 |
| *MLPH* | rs2292884 |
| *WFS1* | rs1801214 |
| *IFIH1* | rs1990760 |
| *BUD13* | rs11820589 |
| *SLC39A8* | rs13107325 |
| *HFE* | rs1799945 |
| *IL6R* | rs2229238 |
| *SLC17A4* | rs11754288 |
| *CCDC170* | rs3734805 |
| *MC1R* | rs1805007 |
| *FAM208B* | rs2797501 |
| *TFPI* | rs7586970 |
| *FADS1* | rs174546 |
| *PRKCQ* | rs11258747 |
| *CHRNA3* | rs1051730 |
| *IREB2* | rs13180 |
| *HERC5* | rs10516809 |
| *ATF1* | rs17291650 |
| *OASL* | rs3213545 |
| *APOB* | rs693 |
| *CCHCR1* | rs130067 |
| *FARP2* | rs757978 |
| *PPP1R3B* | rs3748140 |
| *PRRC2C* | rs2421847 |
| *LOC390956* | rs7245858 |
| *AGER* | rs2070600 |
| *P2RX7* | rs3751143 |
| *AGL* | rs17121403 |
| *TNS1* | rs2571445 |
| *LPA* | rs3798220 |
| *HFE* | rs1800562 |
| *HNF4A* | rs1800961 |
| *BCHE* | rs1803274 |
| *LPL* | rs268 |
| *BRCA2* | rs11571833 |
| *PCIF1* | rs7679 |
| *SCGB1A1* | rs3741240 |
| *MED24* | rs2302777 |
| *IL13* | rs20541 |
| *ANKLE1* | rs2363956 |
| *SH2B3* | rs3184504 |
| *KCNJ11* | rs5215 |
| *IL7R* | rs6897932 |
| *CD226* | rs763361 |
| *KIAA1462* | rs3739998 |
| *EDC4* | rs8060686 |
| *CAPSL* | rs1445898 |
| *PPARG* | rs1801282 |
| *ZC3HC1* | rs11556924 |
| *RFWD3* | rs4888262 |
| *CLEC2D* | rs3764021 |
| *ADAMTS7* | rs3825807 |
| *MYNN* | rs10936599 |
| *ADH7* | rs971074 |
| *CHRNA3* | rs8040868 |
| *CAMK2B* | rs1127065 |
| *LDLR* | rs2228671 |
| *ULK4* | rs1052501 |
| *ADH1B* | rs1229984 |
| *ATM* | rs1801516 |
| *ULK4* | rs2272007 |
| *SLC30A8* | rs13266634 |
| *TYK2* | rs2304256 |
| *THADA* | rs7578597 |
| *ABCA7* | rs3752246 |
| *GCKR* | rs1260326 |
| *LPL* | rs328 |
| *SLC30A8* | rs3802177 |
| *MARCH10* | rs2251393 |
| *KCNJ11* | rs5219 |
| *APOE* | rs429358 |
| *TREM2* | rs75932628 |
